# Supplementary material
Source: PubMed Central journal article supplement (PMC6645513)
Supplement: ao8b02086_si_001.pdf [file ao8b02086_si_001.pdf]

# **Ag Nanometallic Surfaces for Self-Assembled Ordered Morphologies of Zein**

*Apoorva Gurtu, Mandeep Singh Bakshi\**

*Department of Natural and Applied Sciences,  
University of Wisconsin - Green Bay, 2420  
Nicolet Drive, Green Bay, WI 54311-7001, USA.*

# Figure S1

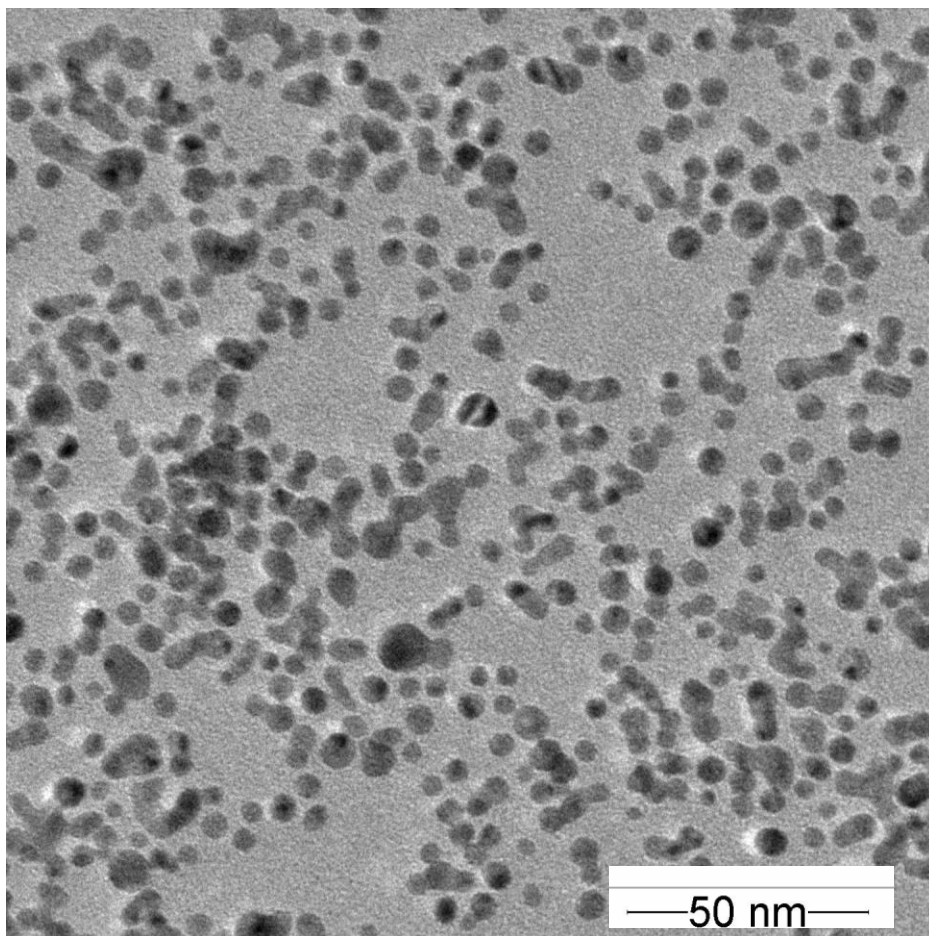

Transmission electron microscopic image of gold seeds.

# Figure S2

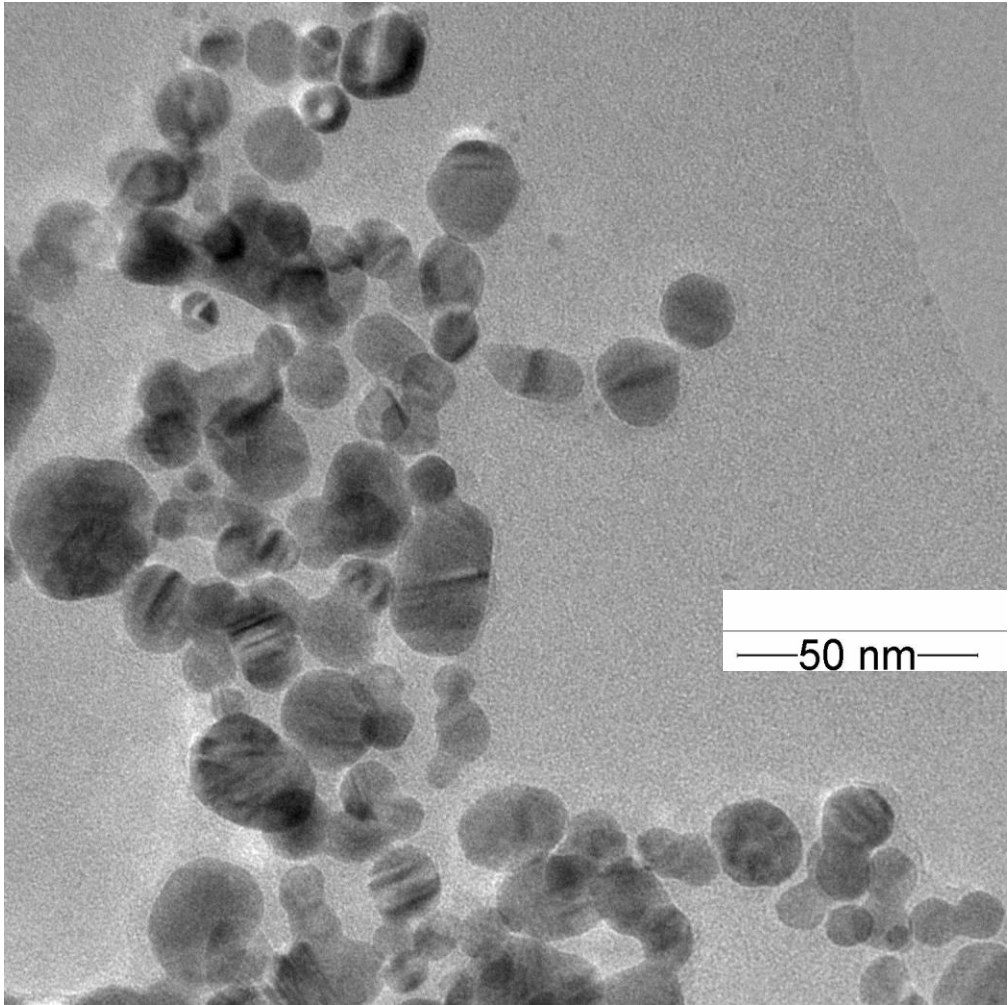

Transmission electron microscopic image of silver seeds.

# Figure S3

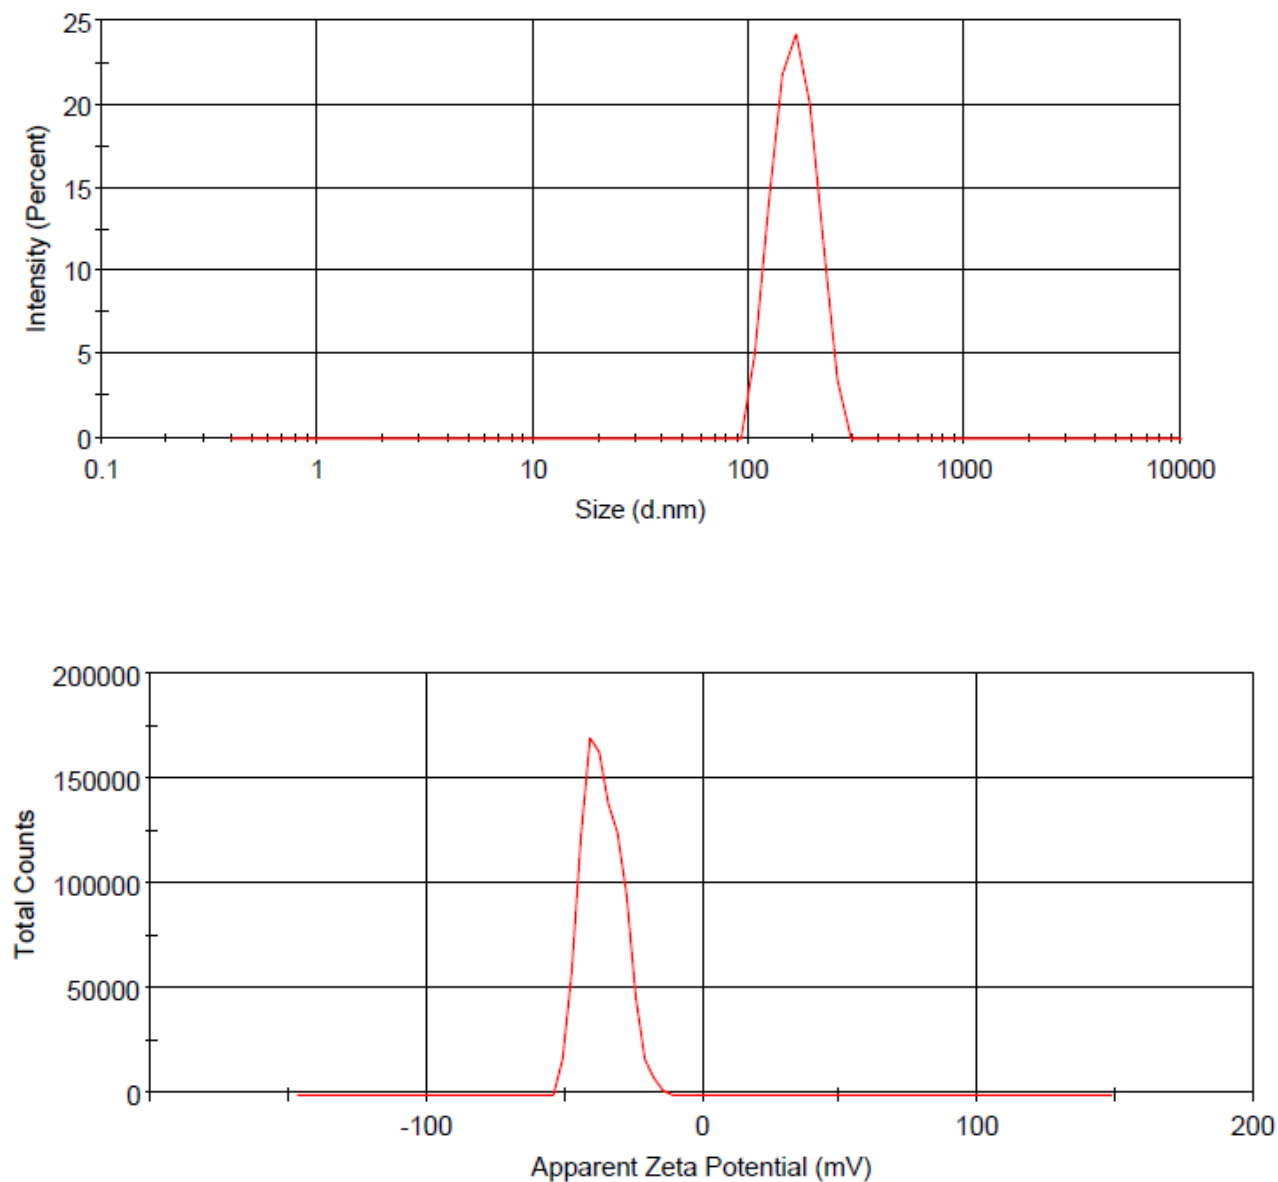

Size (upper frame) and zeta potential (lower frame) measurements of samples NC1 (see Table 1).

# Figure S4

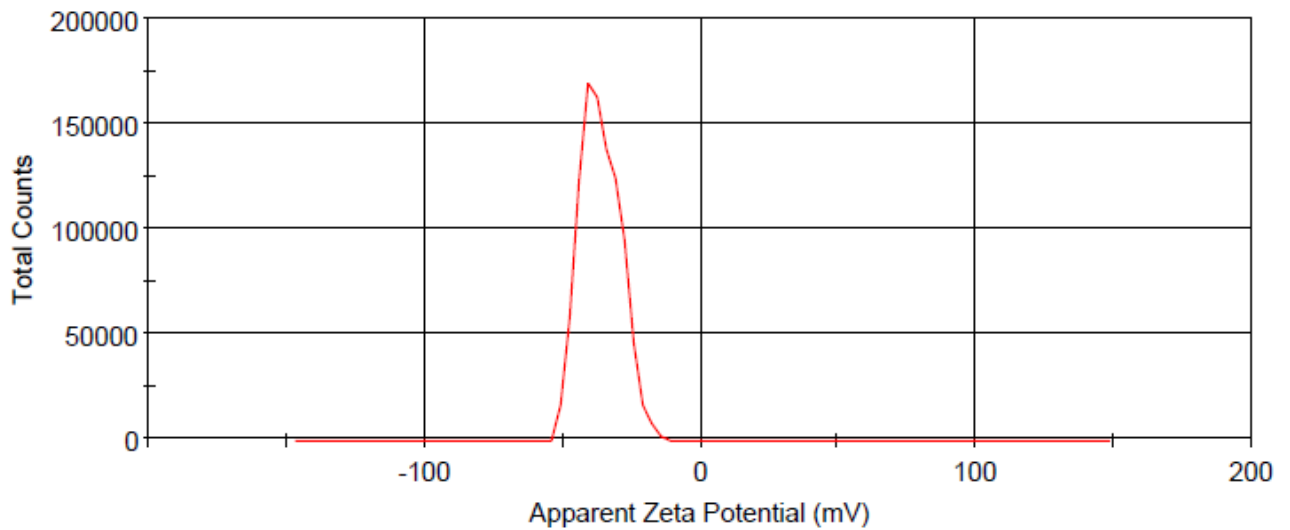

zeta potential measurements of samples NC3 (see Table 1).

# Figure S5

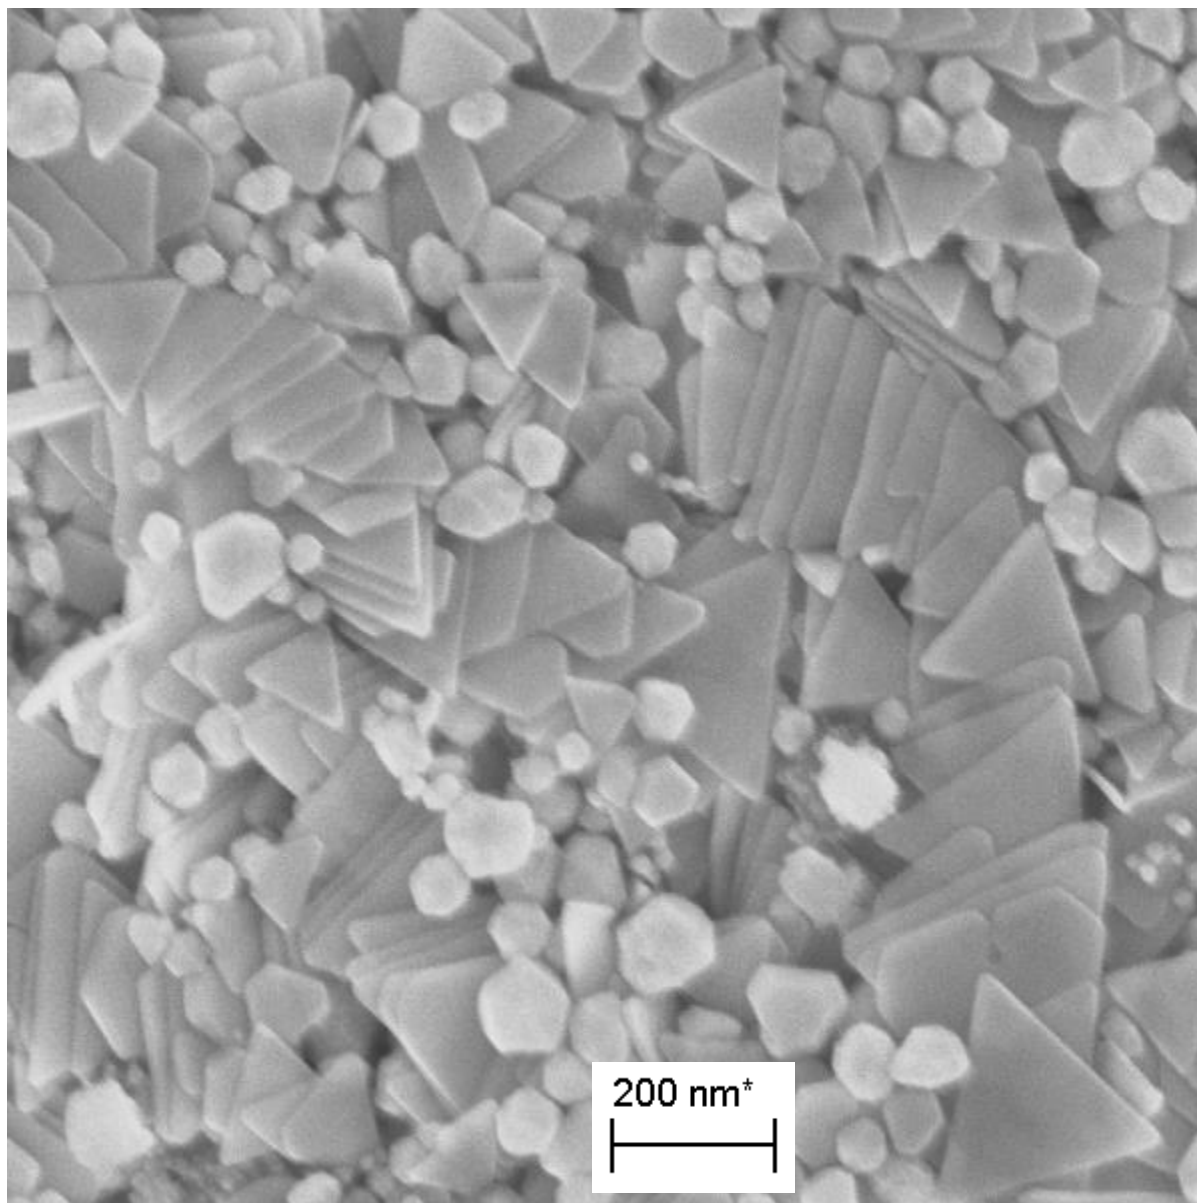

SEM image of Ag – Au bimetallic triangular planar NPs. See experimental for the synthesis.

# Figure S6

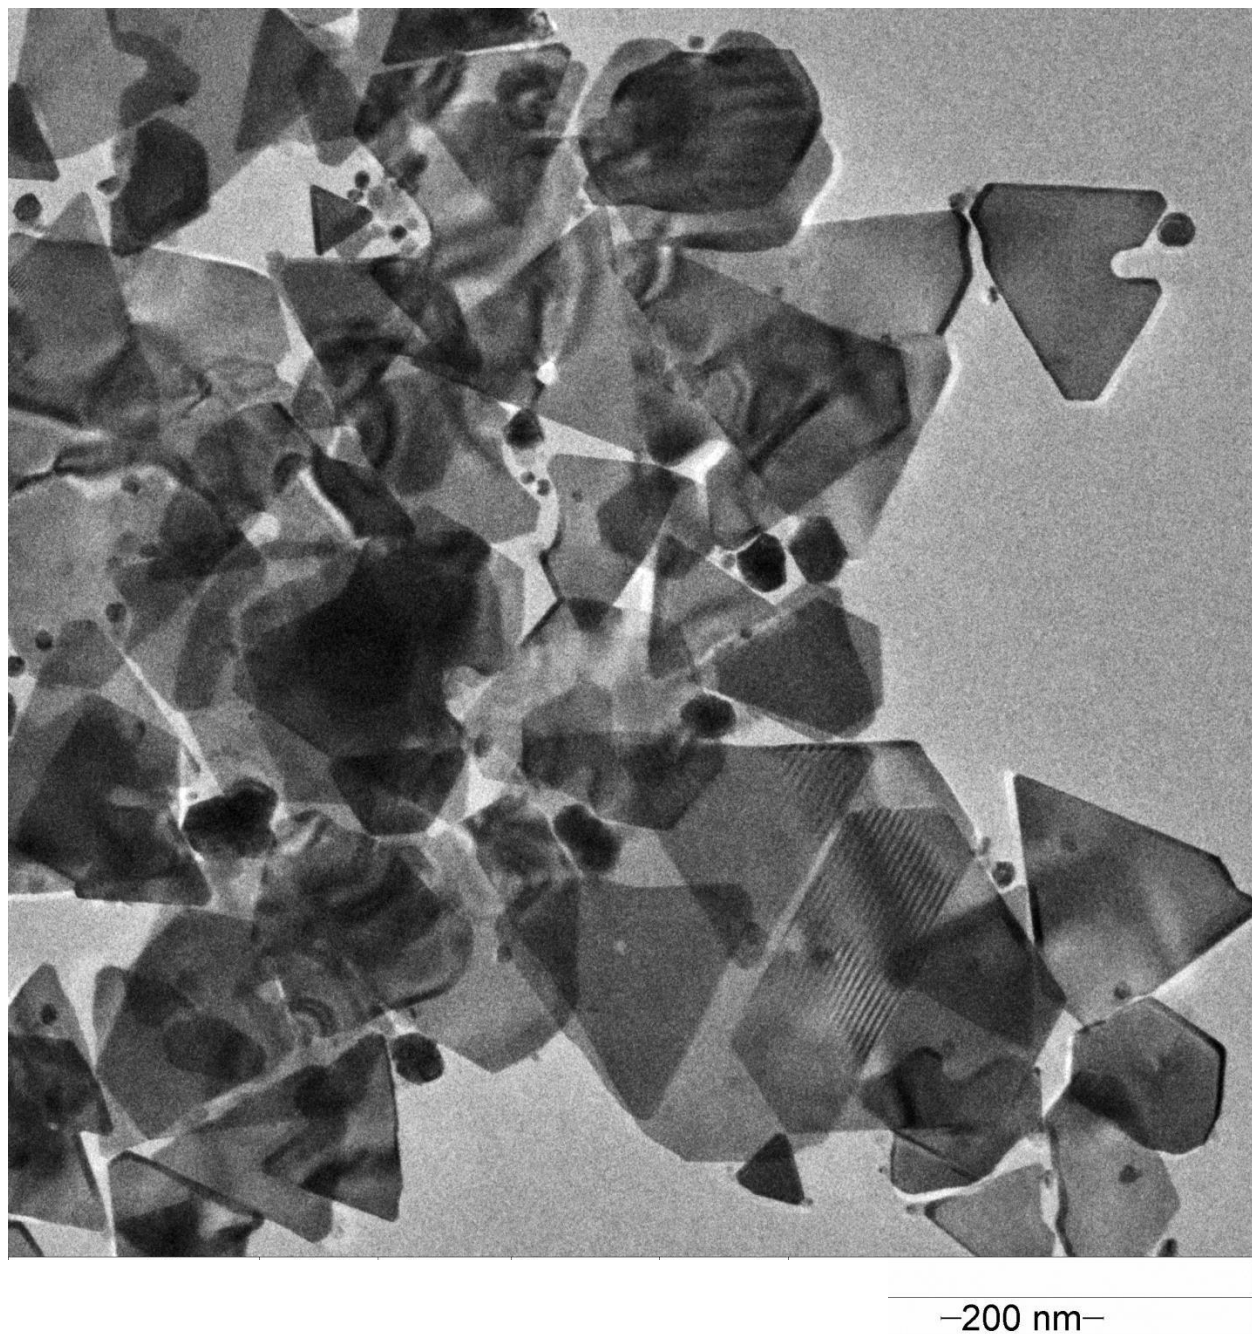

TEM image of Ag – Au bimetallic triangular planar NPs. See experimental for the synthesis.

# Figure S7

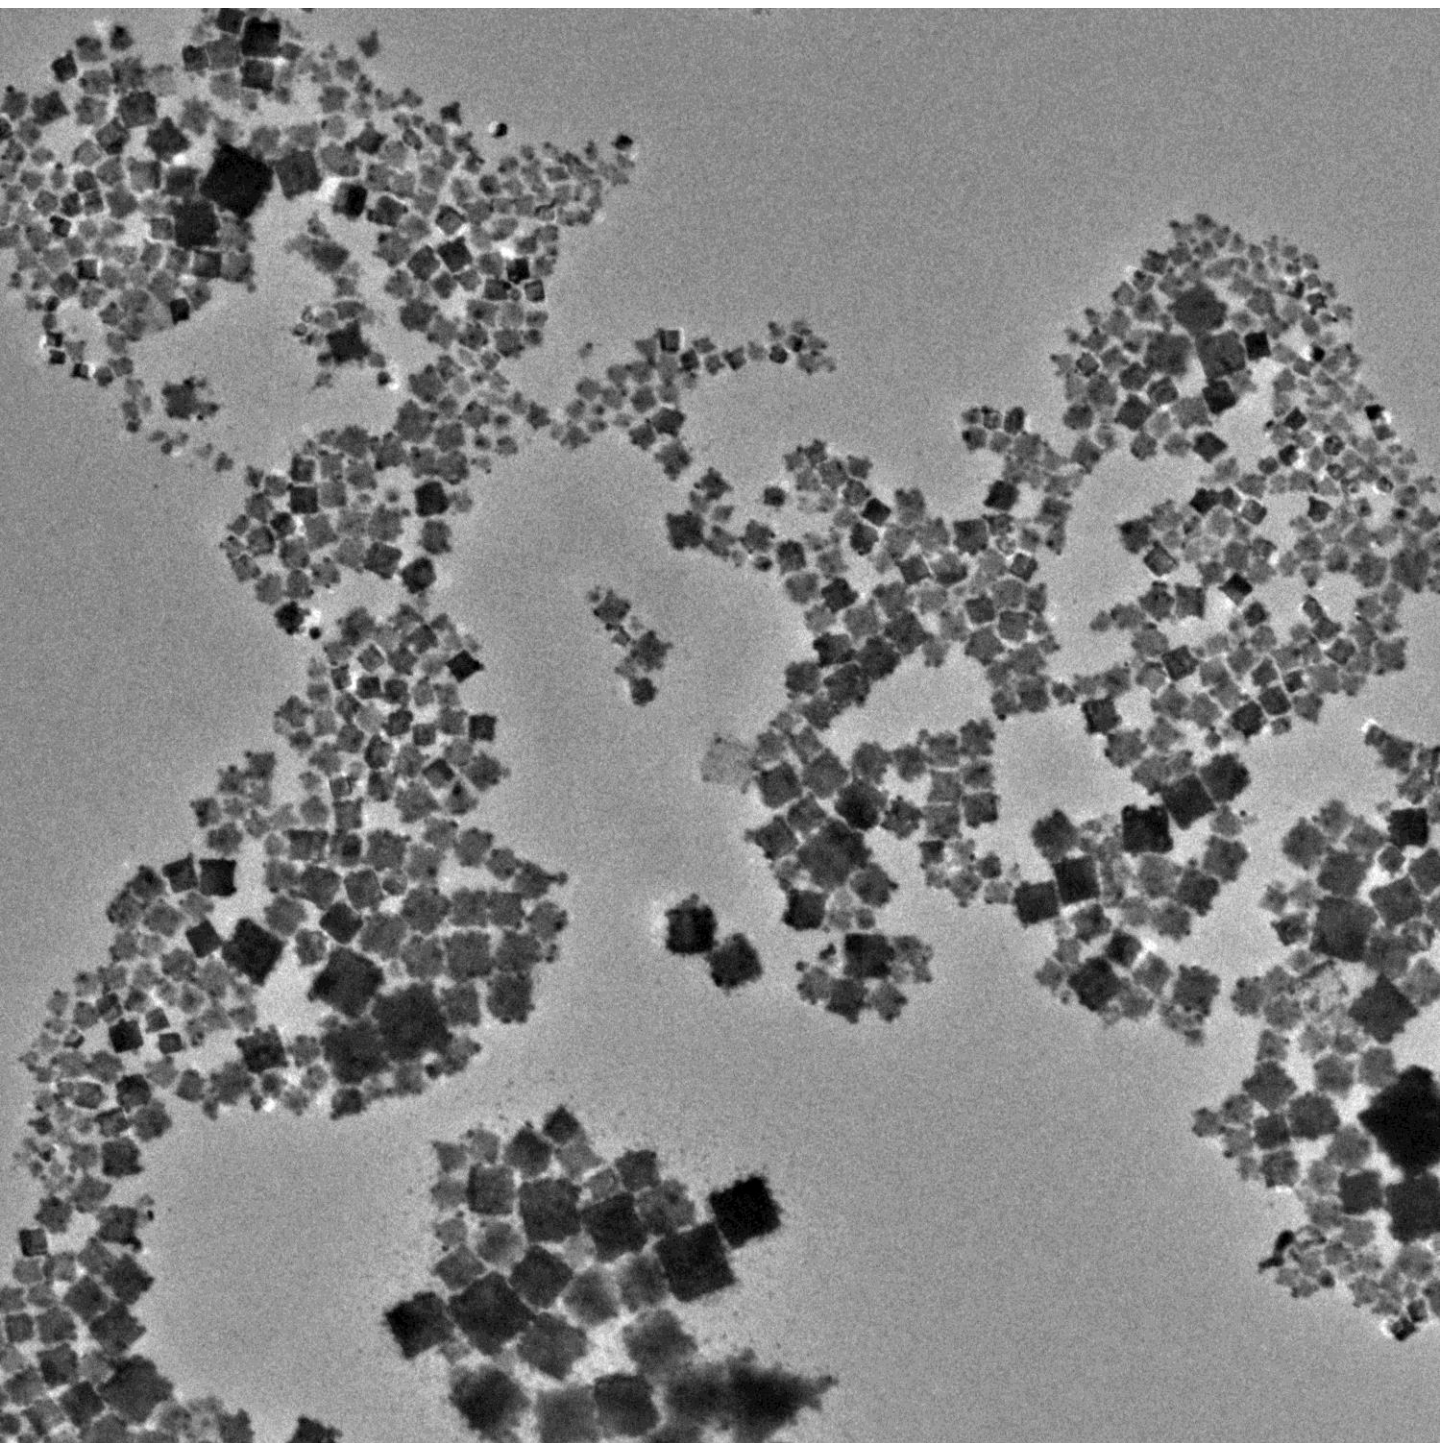

—500 nm—

TEM images of zein self-assembled morphologies of samples NC7 (Table 3)



# Figure S8

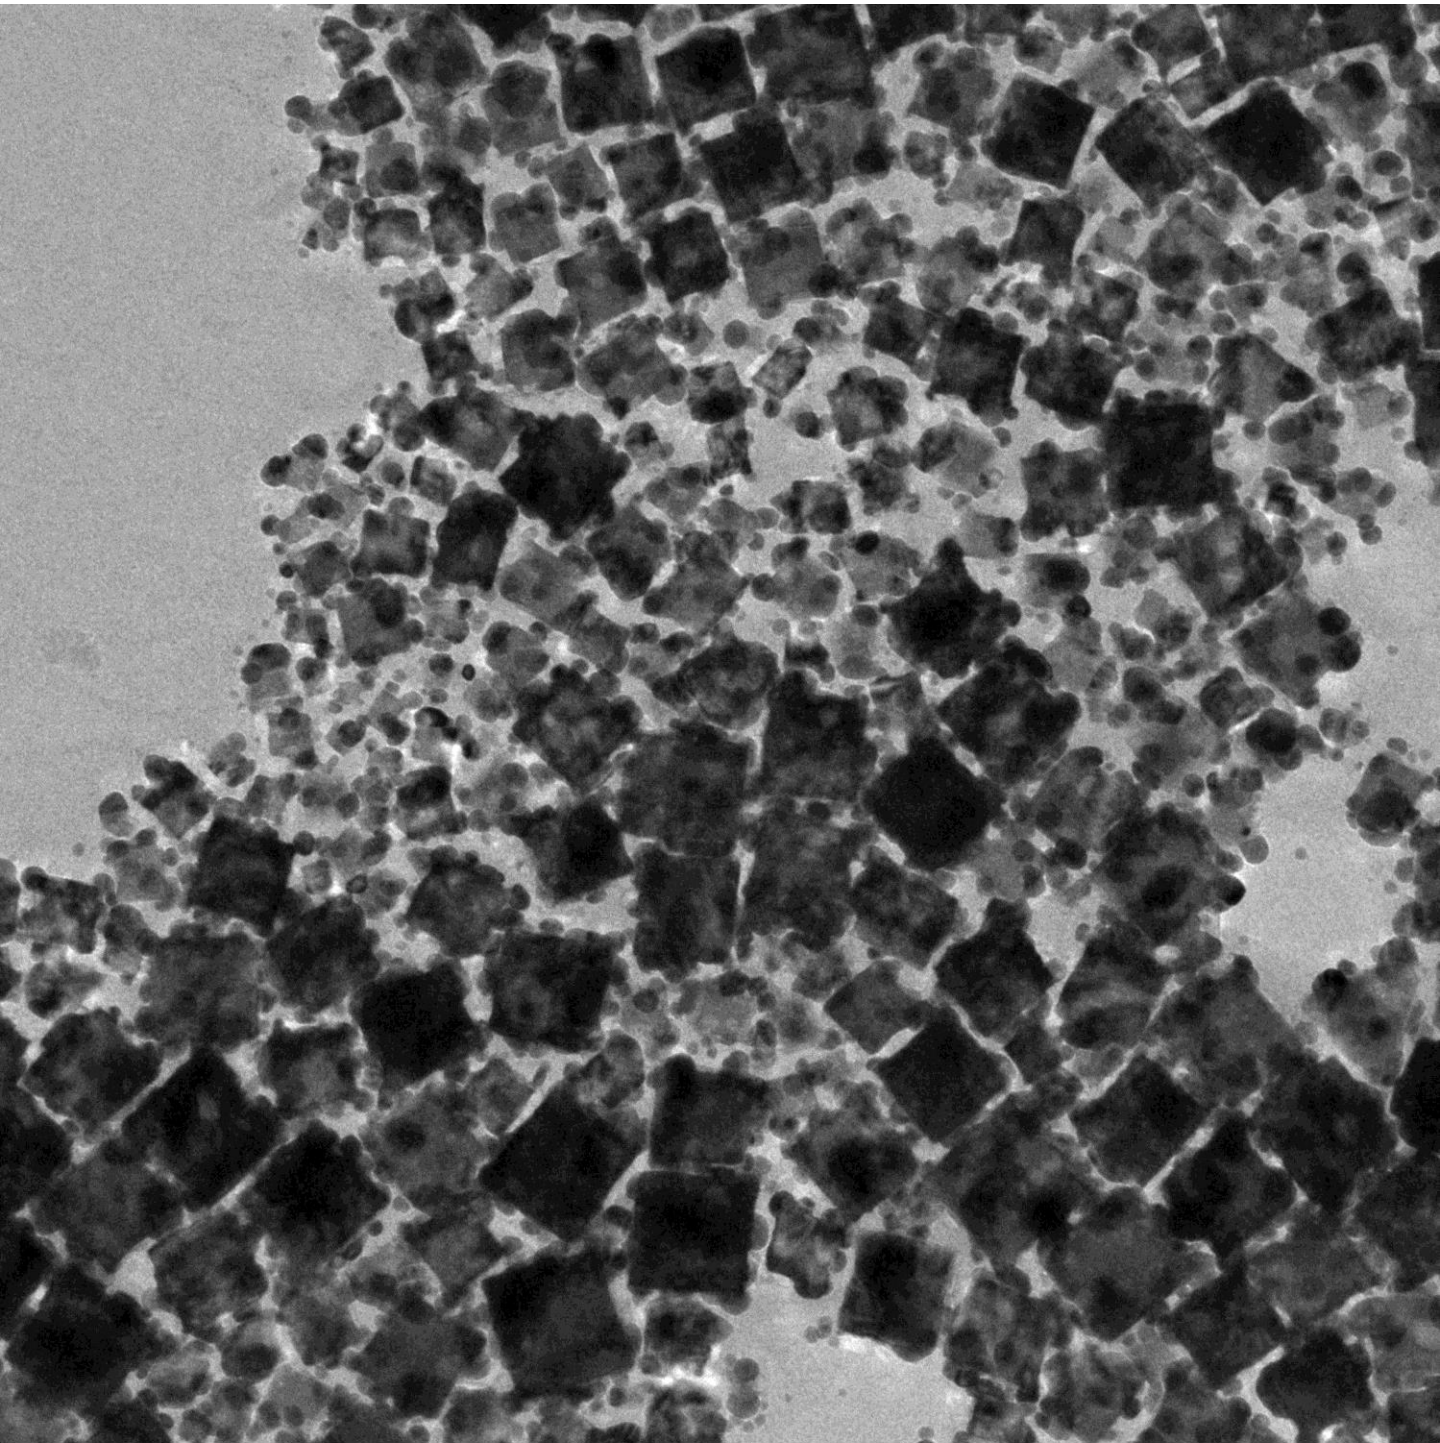

—200 nm—

TEM images of zein self-assembled morphologies of samples NC8  
(Table 3)
